# Supplementary material for: A cancer vaccine based on fluorine-modified sialyl-Tn induces robust immune responses in a murine model
Source: PubMed Central journal article supplement (PMC5564568; doi:10.18632/oncotarget.17646), 2017-05-07
Supplement: oncotarget-08-47330-s001.pdf [file oncotarget-08-47330-s001.pdf]

## A cancer vaccine based on fluorine-modified sialyl-Tn induces robust immune responses in a murine model

### Supplementary Materials

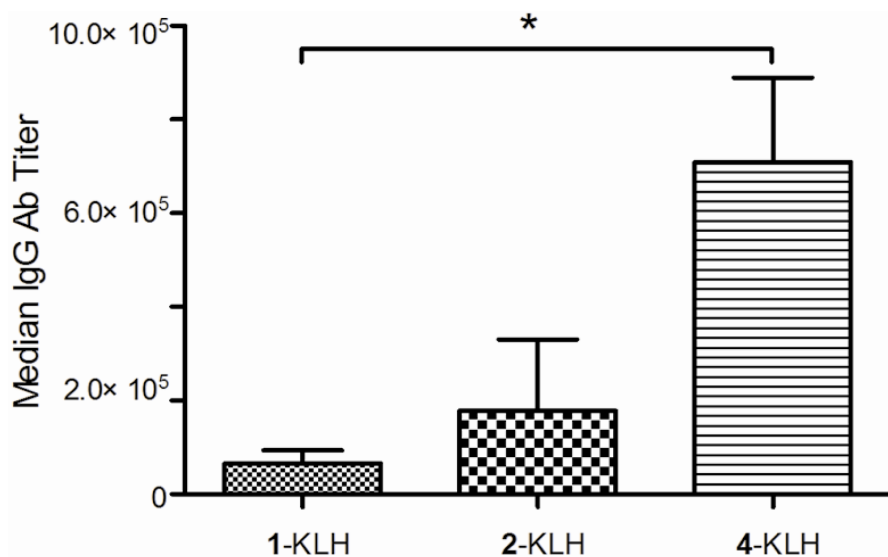

**Supplementary Figure 1: ELISA anti-STn antibody titers after third immunization with antigen in the presence of adjuvant.** ELISA plates were coated with STn-BSA and the antibody titer was defined as the highest dilution showing an absorbance of 0.1, after subtracting background. Results are expressed as the mean of individual  $\pm$  SEM; \* $p < 0.05$  using  $T$  test. The results are representative of three independent experiments.

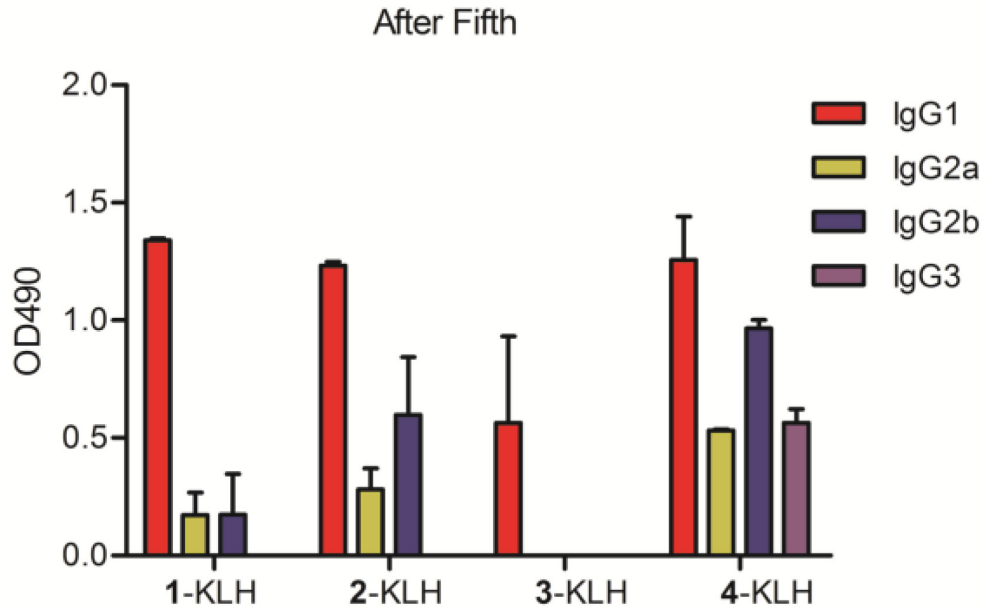

**Supplementary Figure 2: IgG subtypes after fifth immunized with 1-KLH, 2-KLH, 3-KLH and 4-KLH in the presence of adjuvant by ELISA with a 1:1000 dilution of pooled sera.** The pooled sera obtained from 14 days after the 5th vaccination. OD490 = optical density at 490 nm. Results are expressed as the mean  $\pm$  SEM of at least two experiments.

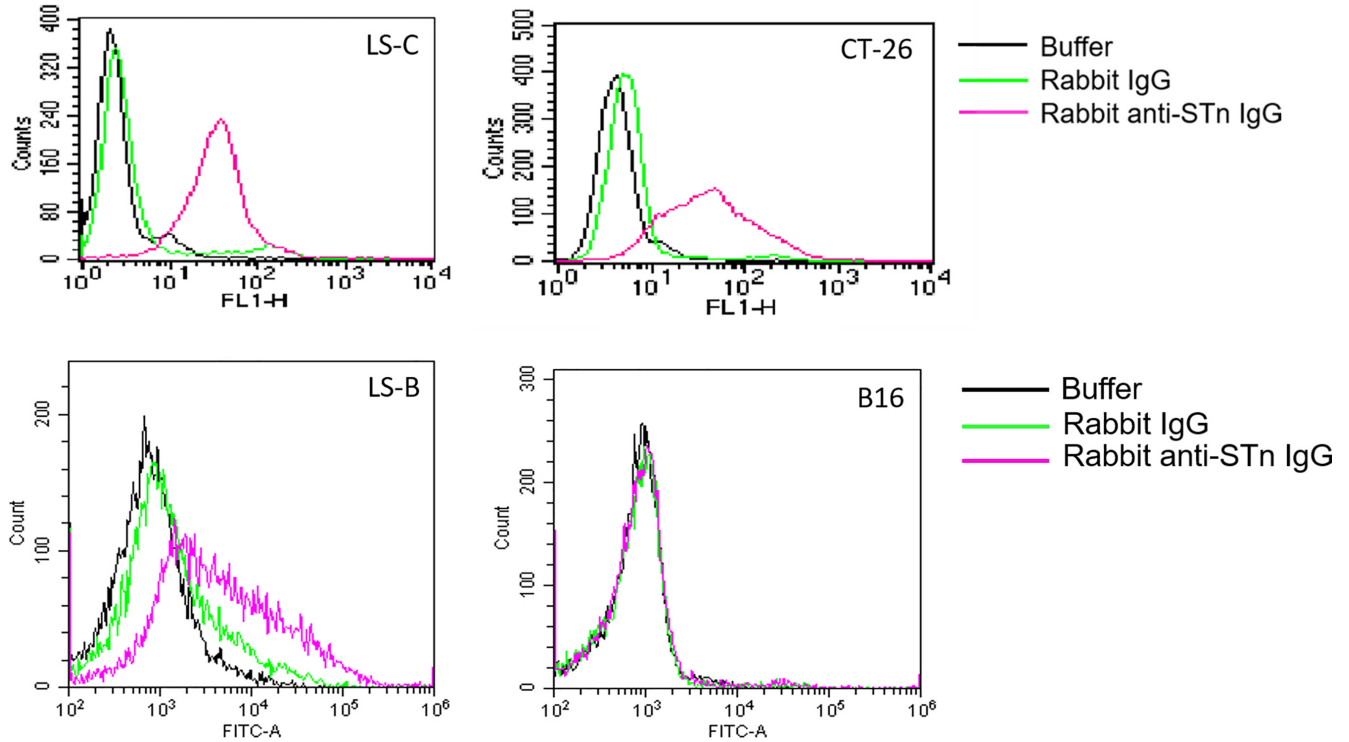

**Supplementary Figure 3: Serological IgG analysis results on cancer cells by flow cytometry.** The rabbit anti-STn IgG was used and tested against STn-positive cells (LS-C and LS-B human colon carcinomas cells; CT-26 mouse colon carcinomas cells; B16 mouse melanoma cells). Rabbit IgG and buffer were used as negative control. Rabbit anti-STn IgG polyclonal antibody was prepared by our laboratory. The results are representative of two independent experiments.

**Supplementary Table 1: Carbohydrate loading of glycoconjugates**

| <b>Sample</b> | <b>KLH conjugates loading (%)</b> | <b>BSA conjugates loading (%)</b> |
|---------------|-----------------------------------|-----------------------------------|
| <b>1</b>      | 1.73                              | 5.59                              |
| <b>2</b>      | 1.75                              | 7.93                              |
| <b>3</b>      | 2.05                              | 4.73                              |
| <b>4</b>      | 2.82                              | 8.97                              |
